# Supplementary material
Source: publisher site journal article supplement (https://www.dovepress.com/article/475489)
Supplement: Supplementary file 1 [file get_supplementary_file.php]

Supplemental Table 1: Open-ended response to “other” option on survey questions “How are procedures shared between surgery, emergency medicine, and anesthesia?” and “How is the role of lead team shared between surgery and emergency medicine?”

| How are procedures shared between surgery, emergency medicine, and anesthesia? | |
| --- | --- |
| Other: | |
| - EM and surgery alternate team lead based on time of day and the team lead assigns procedures, often to the junior resident from the other service. Ultimately surgery and EM alternate invasive procedures. EM manages all airway | - EM manages airway; surgery and EM share invasive procedures (not on a regular alternation, but depends on type of trauma and who is available) |
| - EM manages airway; surgery performs MOST invasive procedures depending on the situation and critical nature of the trauma. ED frequently puts in central lines and chest tubes but not on a pre-defined schedule | - EM Manages Airway. Other procedures are shared between EM and trauma. Typically trauma does Thoracotomies but they let our residents do them sometimes. . |
| - EM manages airway. Surgery and EM share chest tubes only (even/odd days). All other invasive procures are EM. | - EM manages airway. EM and surgery share other procedures, but no specific side or day. It is worked out collegially |
| - EM and Trauma share team leadership by alternating days, EM manages airway on all traumas. | - EM Manages airway and all resuscitative procedures (Trauma gets priority for trauma cric and thoracotomy, but ED also performs these) |
| - EM attending manages the airway on all level 1 patients. Odd days: Surgery is team lead and does procedures on pt's right, EM does primary survey and procedures on pt's left. Even days: EM is team lead w/procedures on the right and Surgery is primary w/procedures on the left | - Em manages airway: in theory EM and trauma share other procedures based on who in the group needs them. But I would say thus trends towards favoring trauma. ED always does FAST. |
| - EM manages all airway and procedures and surgery is present to assist whenever needed; collaboration | - EM Residents are on the Trauma Surgery Service for 3 months out of their training, during which time they are responsible for leading trauma resuscitations, procedures, etc. So EM and trauma do not share technically because the EM residents are acting as trauma residents on the surgery service. |
| - highest level activation (red) EM does airway, surgery does rest, next level (alert), EM does everything | - EM manages airway; surgery and EM share invasive procedures as mutually agreed upon by ED and trauma attending |
| - EM manages airway; EM & Surgery share invasive procedures without a formal policy on sharing. | - EM manages airway; FAST; surgery and EM share invasive procedures via cooperative effort: who needs one, who is signed off, etc.... |
| How is the role of lead team shared between surgery and emergency medicine? | |
| Other: | |
| - Shared; EM takes team lead on Level 3 traumas and surgery takes Level 1&2 traumas | - We have three levels of trauma EM completely manages level 3, Trauma chief is team lead on level 2 trauma chief with trauma attending present is lead on level 1. If the trauma attending is not present the ED attending is the attending of record |
| - Shared. EM leads all level 2, EM & Surgery share level 1. | - Level 1s shared as described above. EM is always team lead on all level 2s |
| - At one site, surgery res is team lead. At the other, EM res is team lead. | - Shared, EM takes team lead on level 2 traumas; surgery and EM share team lead for Level 1 depending on day |
| - at home site EM manages everything. At trauma site, EM manages airway and procedures by side, surgery is team lead | - shared; EM takes the lead on Level 2 traumas, and on Level 1 until surgical attending arrives |

Note: Tables 1 and 2 report the options provided to program directors on the survey.
